# Supplementary material for: Highly Selective Enrichment of Glycopeptides Based on Zwitterionically Functionalized Soluble Nanopolymers
Source: PubMed Central journal article supplement (PMC4944192; doi:10.1038/srep29776), 2016-07-14

# Supporting Information

## Highly Selective Enrichment of Glycopeptides Based on Zwitterionically Functionalized Soluble Nanopolymers

Wei qian Cao, ‡ Jiangming Huang, ‡ Biyun Jiang, Xing Gao and Pengyuan Yang\*

**Table S1.** Three replicated zeta potential measurements of the ZICF-PAMAM.

| Replicates | T/°C | Zeta potential/mV |
|------------|------|-------------------|
| 1          | 24.9 | 39.2              |
| 2          | 25.0 | 38.2              |
| 3          | 25.1 | 44.4              |

**Figure S1.** MALDI-TOF spectra of 5 pmol tryptic digests of asialofetuin enriched by ZICF-PAMAM and without PNGase F treatment. (The plus sign denotes glycopeptides.)

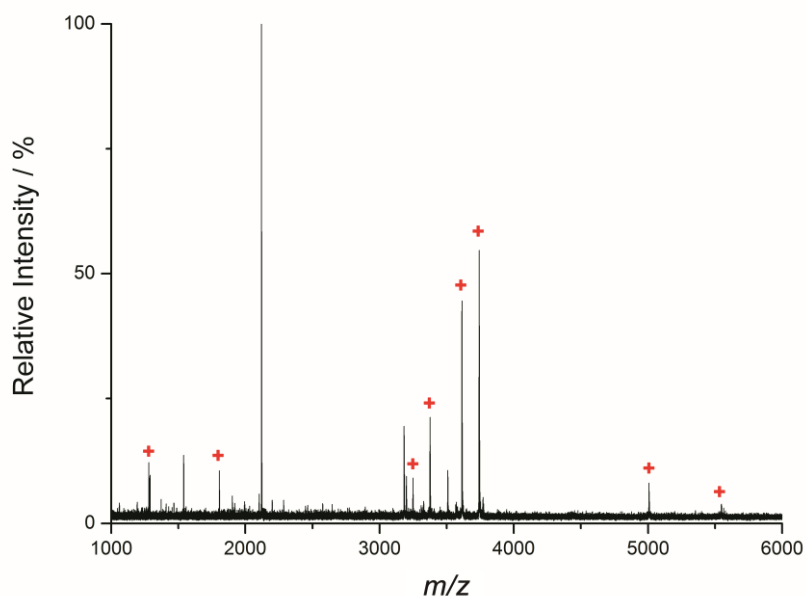

‡: These authors contributed equally.

**Figure S2.** MALDI-TOF spectra of 5 pmol tryptic digests of asialofetuin enriched by commercial amino materials. (The asterisk denotes the deglycosylated glycopeptide. The pound sign denotes the doubly charged species.)

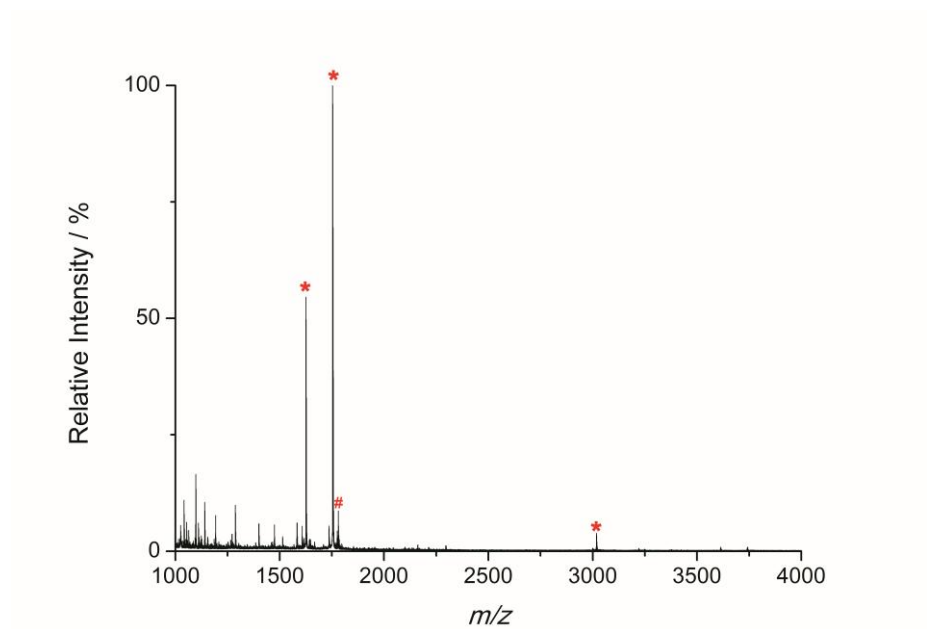

**Figure S3.** Chemical structures and enrichment principles of commercial materials a) and ZICF-PAMAM b).

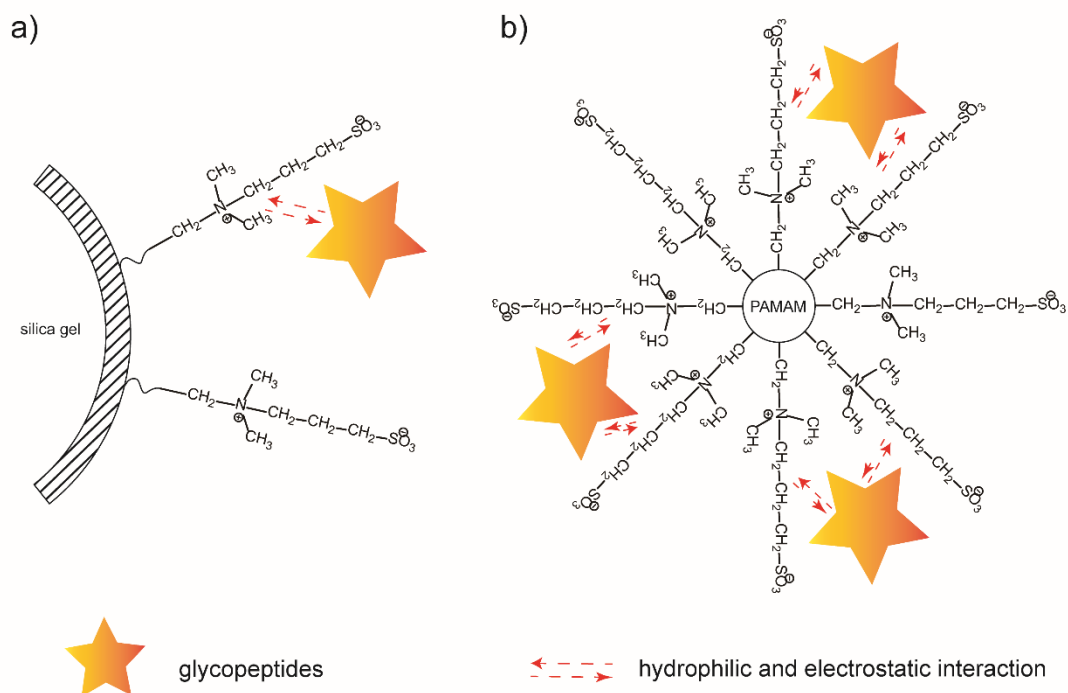

**Figure S4.** MALDI-TOF spectra of 5 pmol tryptic digests of bovine fetuin a) deglycosylated by PNGase F, b) enriched by ZICF-PAMAM and deglycosylated by PNGase F, c) enriched by commercial ZIC-HILIC materials and deglycosylated by PNGase F. d) enriched by commercial amino materials and deglycosylated by PNGase F. (The asterisk denotes the deglycosylated glycopeptides. The pound sign denotes the doubly charged species.)

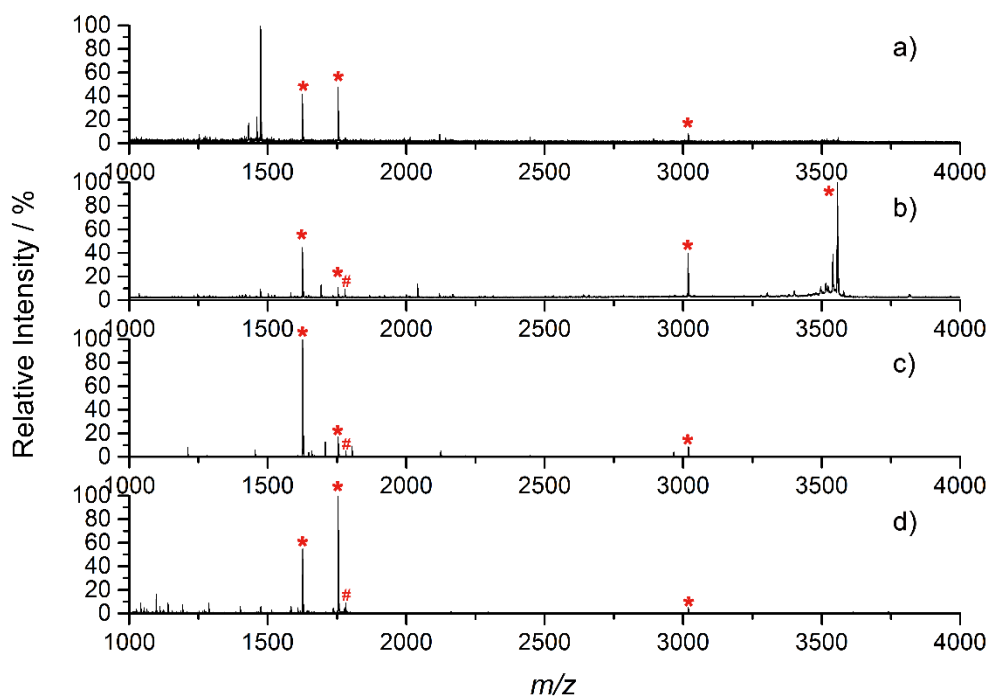

**Figure S5.** MALDI-TOF MS spectrum of analysis of asialofetuin at a concentration of 0.0155  $\mu\text{g}/\mu\text{L}$  after enrichment with ZICF-PAMAM then deglycosylated by PNGase F. (The asterisk denotes the deglycosylated glycopeptide and the pound sign denotes the doubly charged species).

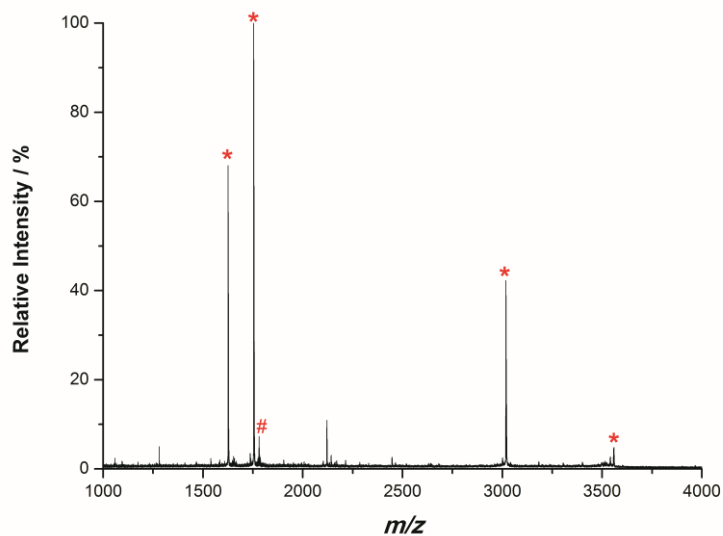

**Table S2** Results of LC-MS/MS analysis of N-glycopeptides isolated from the four-glycoproteins mixture.

| Standard glycoprotein | Sequences of identified glycoproteins  | Theoretical glycosylation sites | Identified glycosylation sites |
|-----------------------|----------------------------------------|---------------------------------|--------------------------------|
| Fetuin                | K.LCPDCPLLAPLN#DSR.V                   | 3                               | 3                              |
|                       | R.KLCPDCPLLAPLN#DSR.V                  |                                 |                                |
|                       | R.VVHAVEVALATFNAESN#GSYLQLVEISR.A      |                                 |                                |
|                       | R.RPTGEVYDIEIDTLETTCHVLDPTPLAN#CSV.R.Q |                                 |                                |
| Ovalbumin             | K.WTNDLGSN#MTIGAVNSR.G                 | 1                               | 1                              |
| IgG                   | R.EEQFN#STFR.V                         | 2                               | 2                              |
|                       | K.TKPREEQYN#STYR.V                     |                                 |                                |
|                       | R.EEQYN#STYR.V                         |                                 |                                |
| RNB                   | K.SRN#LTKDR.C                          | 1                               | 1                              |

N# denotes the N-glycosylation sites.

### S-1. Calculation of the enrichment recovery of ZICF-PAMAM towards glycopeptides

The enrichment recovery was evaluated by our previously developed  $^{18}\text{O}$  labeling technique (*ACS Appl. Mater. Interfaces* **5**, 614-621 (2013) ) with a little modification. Briefly tryptic digested peptides of asialofetuin (ASF) were divided into two of equal amount. One of them was enriched by ZICF- PAMAM and released by PNGase F in 50 mM ammonium bicarbonate solution prepared by  $\text{H}_2^{16}\text{O}$ . The other one was directly treated by PNGase F in 50 mM ammonium bicarbonate solution prepared by  $\text{H}_2^{18}\text{O}$ . Then the two samples were mixed and analyzed by MALDI-MS.

Taken into account the influence of isotope peaks and labeling efficiency, a self-conducted equation was used to obtain the accurate recovery rate of our material. The calculated equation is as follows:

$$\text{recovery rate} = \frac{I_A - r_a I_B}{I_B - r_b I_A}$$

$I_A$ : intensity of monoisotope peak of ASF glycopeptides in the sample enriched by ZICF-PAMAM;

$I_B$ : intensity of 2 Da higher peak in the  $^{18}\text{O}$  labeled sample corresponding to the same glycopeptide of ASF without enrichment;

$r_a$ : ratio of the labeling efficiency for enzymatic  $^{18}\text{O}$  labeling method. The  $r_a$  was calculated to be 0.11 by experiment;

$r_b$ : ratio of 2 Da higher peak against monoisotope peak of glycopeptides. The  $r_b$  was calculated by a web-based tool called *MS-Isotope* (<http://prospector.ucsf.edu/prospector/cgi-bin/msform.cgi?form=msisotope>) using each peptide sequence. For peptide LCPDCPLLAPLNDSR,  $r_b$  equals to 0.5194, and for peptide KLCPCPLLAPLNDSR,  $r_b$  equals to 0.5918.

**Table S3** Recovery of two of most abundance glycopeptides from asialofetuin digests after enrichment by ZICF-PAMAM.

| Glycopeptide sequence | Observed peptide m/z(after enrichment) | Observed peptide m/z(before enrichment) | Peak area after enrichment | Peak area before enrichment | Recovery rate(%) | STD(%) | Averaged recovery rate(%) |
|-----------------------|----------------------------------------|-----------------------------------------|----------------------------|-----------------------------|------------------|--------|---------------------------|
| LCPDCPLLAPLNSDR       | 1625.80                                | 1627.80                                 | 8869.8                     | 12802.7                     | 91.04            |        |                           |
| LCPDCPLLAPLNSDR       | 1625.85                                | 1627.84                                 | 6894.1                     | 10044.7                     | 89.56            | 0.77   | 90.42                     |
| LCPDCPLLAPLNSDR       | 1625.86                                | 1627.86                                 | 7585.9                     | 10975.3                     | 90.67            |        |                           |
| KLCPDCPLLAPLNSDR      | 1753.91                                | 1755.91                                 | 2581.6                     | 3814.5                      | 94.55            |        |                           |
| KLCPDCPLLAPLNSDR      | 1753.96                                | 1955.96                                 | 1917.6                     | 2932.2                      | 88.74            | 4.06   | 90.01                     |
| KLCPDCPLLAPLNSDR      | 1753.97                                | 1755.97                                 | 1907.5                     | 2953.7                      | 86.72            |        |                           |

**Table S4** List of identified glycoproteins and glycopeptide sequences from tryptic digests of 1  $\mu$ L human plasma enriched by ZICF-PAMAM and analyzed by LC-MS/MS with three replicates.

| Protein accession number | Protein description                                       | Peptide sequence                     | Sites annotated in Uniprot |
|--------------------------|-----------------------------------------------------------|--------------------------------------|----------------------------|
| P01009                   | Alpha-1-antitrypsin OS=Homo sapiens GN=SERPINA1 PE=1 SV=3 | QLAHQSN#STNIFFSPVSIATAFAMLSLGTK      | known                      |
| P01009                   | Alpha-1-antitrypsin OS=Homo sapiens GN=SERPINA1 PE=1 SV=3 | ADTHDEILEGLNFN#LTEIPEAQIHEGFQELLR    | known                      |
| P01023                   | Alpha-2-macroglobulin OS=Homo sapiens GN=A2M PE=1 SV=3    | SLGNVN#FTVSAAEALESQELCGTEVPSVPEHGR   | known                      |
| P01023                   | Alpha-2-macroglobulin OS=Homo sapiens GN=A2M PE=1 SV=3    | GNEANYYSNATTDEHGLVQFSIN#TTNVMGTSLTVR | known                      |
| P01024                   | Complement C3 OS=Homo sapiens GN=C3 PE=1 SV=2             | TVLTPATNHMGN#VTFTIPANR               | known                      |

|        |                                                                |                                           |                    |
|--------|----------------------------------------------------------------|-------------------------------------------|--------------------|
| P04114 | Apolipoprotein B-100 OS=Homo sapiens GN=APOB PE=1 SV=2         | FN#SSYLQGTNQITGR                          | known              |
| P04114 | Apolipoprotein B-100 OS=Homo sapiens GN=APOB PE=1 SV=2         | VNQNLVYESGSLN#FSK                         | known              |
| P04114 | Apolipoprotein B-100 OS=Homo sapiens GN=APOB PE=1 SV=2         | QVFPGLN#YCTSGAYSN#ASSTDSASYPLTGDTR        | unknown;prediction |
| P01011 | Alpha-1-antichymotrypsin OS=Homo sapiens GN=SERPINA3 PE=1 SV=2 | TLN#QSSDELQLSMGNAMFVK                     | known              |
| P00738 | Haptoglobin OS=Homo sapiens GN=HP PE=1 SV=1                    | NLFLN#HSENAATAK                           | known;known        |
| P00738 | Haptoglobin OS=Homo sapiens GN=HP PE=1 SV=1                    | MVSHHN#LTTGATLINEQWLLTTAK                 | known              |
| P01871 | Ig mu chain C region OS=Homo sapiens GN=IGHM PE=1 SV=3         | YKN#NSDISSTR                              | known              |
| P01871 | Ig mu chain C region OS=Homo sapiens GN=IGHM PE=1 SV=3         | THTN#ISESHPN#ATFSAVGEASICEDDWNSGER        | known;known        |
| P02763 | Alpha-1-acid glycoprotein 1 OS=Homo sapiens GN=ORM1 PE=1 SV=1  | QDQCIYN#TTYLNVQR                          | known              |
| P02787 | Serotransferrin OS=Homo sapiens GN=TF PE=1 SV=3                | CGLVPVLAENYN#K                            | known              |
| P02787 | Serotransferrin OS=Homo sapiens GN=TF PE=1 SV=3                | QQQLFGSN#VTDCSGN#FCLFR                    | known;unknown      |
| P00450 | Ceruloplasmin OS=Homo sapiens GN=CP PE=1 SV=1                  | ELHHLQEQN#VSNAFLDK                        | known              |
| P00450 | Ceruloplasmin OS=Homo sapiens GN=CP PE=1 SV=1                  | ELHHLQEQN#VSNAFLDKGEFYIGSK                | known              |
| P08603 | Complement factor H OS=Homo sapiens GN=CFH PE=1 SV=4           | MDGASN#VTCINSR                            | known              |
| P08603 | Complement factor H OS=Homo sapiens GN=CFH PE=1 SV=4           | SPYEMFGDEEVMCLNGN#WTEPPQCK                | known              |
| P08603 | Complement factor H OS=Homo sapiens GN=CFH PE=1 SV=4           | WDPEVN#CSMAQIQLCPPPQIPNSHNMTTTLNYR        | known              |
| P08603 | Complement factor H OS=Homo sapiens GN=CFH PE=1 SV=4           | LN#DTLDYECHDGYESNTGSTTGSIVCGYNGWSDLPICYER | known              |
| P02790 | Hemopexin OS=Homo sapiens GN=HPX PE=1 SV=2                     | N#GTGHGN#STHHGPEYMR                       | known;known        |
| P19652 | Alpha-1-acid glycoprotein 2 OS=Homo sapiens GN=ORM2 PE=1 SV=2  | QNQCFFYN#SSYLVNQR                         | known              |

|        |                                                                          |                                                     |                       |
|--------|--------------------------------------------------------------------------|-----------------------------------------------------|-----------------------|
| P02765 | Alpha-2-HS-glycoprotein<br>OS=Homo sapiens GN=AHSG<br>PE=1 SV=1          | AALAAFNAQNN#GSNFQLEEISR                             | known                 |
| P01042 | Kininogen-1 OS=Homo sapiens<br>GN=KNG1 PE=1 SV=2                         | LNAENN#ATFYFK                                       | known                 |
| P01042 | Kininogen-1 OS=Homo sapiens<br>GN=KNG1 PE=1 SV=2                         | HGIQYFNN#NTQHSSLFMLEVK                              | known                 |
| P05090 | Apolipoprotein D OS=Homo<br>sapiens GN=APOD PE=1 SV=1                    | CIQAN#YSLMENGK                                      | known                 |
| P05090 | Apolipoprotein D OS=Homo<br>sapiens GN=APOD PE=1 SV=1                    | ADGTVNQIEGEATPVN#LTEPAK                             | known                 |
| P25311 | Zinc-alpha-2-glycoprotein<br>OS=Homo sapiens GN=AZGP1<br>PE=1 SV=2       | FGCEIENN#R                                          | known                 |
| P25311 | Zinc-alpha-2-glycoprotein<br>OS=Homo sapiens GN=AZGP1<br>PE=1 SV=2       | DIVEYYN#DSN#GSHVLQGR                                | known;known           |
| P25311 | Zinc-alpha-2-glycoprotein<br>OS=Homo sapiens GN=AZGP1<br>PE=1 SV=2       | GDVLHNGN#GTYQSWVVAVPPQDTAPYSCHVQHSSLAQPLV<br>VPWEAS | known                 |
| P04220 | Ig mu heavy chain disease<br>protein OS=Homo sapiens PE=1<br>SV=1        | THTN#ISESHPN#ATFSAVGEASICEDDWDSGER                  | unknown;known         |
| P02749 | Beta-2-glycoprotein 1 OS=Homo<br>sapiens GN=APOH PE=1 SV=3               | VYKPSAGN#NSLYR                                      | known                 |
| P02749 | Beta-2-glycoprotein 1 OS=Homo<br>sapiens GN=APOH PE=1 SV=3               | DTAVFECLPQHAMFGN#DTITCTTHGN#WTK                     | known;known           |
| P04004 | Vitronectin OS=Homo sapiens<br>GN=VTN PE=1 SV=1                          | NN#ATVHEQVGGPSLTSDLQAQSK                            | known                 |
| P10909 | Clusterin OS=Homo sapiens<br>GN=CLU PE=1 SV=1                            | MLN#TSSLLEQLNEQFNWVSR                               | known                 |
| O75882 | Attractin OS=Homo sapiens<br>GN=ATRN PE=1 SV=2                           | IDSTGN#VTNELR                                       | known                 |
| O75882 | Attractin OS=Homo sapiens<br>GN=ATRN PE=1 SV=2                           | YN#WSFIHCPACQCNGHSK                                 | prediction            |
| O75882 | Attractin OS=Homo sapiens<br>GN=ATRN PE=1 SV=2                           | AATCINPLN#GSVCERPAN#HSAK                            | prediction;prediction |
| P20851 | C4b-binding protein beta chain<br>OS=Homo sapiens GN=C4BPB<br>PE=1 SV=1  | LGHCPDPVLVNGEFSSGPVN#VSDK                           | known                 |
| P04003 | C4b-binding protein alpha chain<br>OS=Homo sapiens GN=C4BPA<br>PE=1 SV=2 | LSVDKDQYVEPEN#VTIQCDSGYGVVGPQSITCSGN#R              | known;known           |
| P04196 | Histidine-rich glycoprotein<br>OS=Homo sapiens GN=HRG<br>PE=1 SV=1       | HSHNN#N#SSDLHPHK                                    | known;unknown         |



|        |                                                                                      |                                               |               |
|--------|--------------------------------------------------------------------------------------|-----------------------------------------------|---------------|
| P04196 | Histidine-rich glycoprotein<br>OS=Homo sapiens GN=HRG<br>PE=1 SV=1                   | VIDFN#CTTSSVSSALANTK                          | known         |
| P06681 | Complement C2 OS=Homo<br>sapiens GN=C2 PE=1 SV=2                                     | LTDTICGVGN#MSAN#ASDQER                        | known;known   |
| P04217 | Alpha-1B-glycoprotein<br>OS=Homo sapiens GN=A1BG<br>PE=1 SV=4                        | FQSPAGTEALFELHN#ISVADSAN#YSCVYVDLKPFFGGSAPSER | known;known   |
| P00734 | Prothrombin OS=Homo sapiens<br>GN=F2 PE=1 SV=2                                       | N#FTENDLLVR                                   | known         |
| P00734 | Prothrombin OS=Homo sapiens<br>GN=F2 PE=1 SV=2                                       | YPHKPEIN#STTHPGADLQEN#FCR                     | known;unknown |
| P05156 | Complement factor I OS=Homo<br>sapiens GN=CFI PE=1 SV=2                              | FLNN#GTCTAEGK                                 | known         |
| P02751 | Fibronectin OS=Homo sapiens<br>GN=FN1 PE=1 SV=4                                      | LDAPTNLQFVN#ETDSTVLVR                         | known         |
| P02751 | Fibronectin OS=Homo sapiens<br>GN=FN1 PE=1 SV=4                                      | GGNSNGALCHFPLYNNHN#YTDCTSEGR                  | known         |
| P43652 | Afamin OS=Homo sapiens<br>GN=AFM PE=1 SV=1                                           | DIENFN#STQK                                   | known         |
| P43652 | Afamin OS=Homo sapiens<br>GN=AFM PE=1 SV=1                                           | N#CCNTENPPGCYR                                | known         |
| P49908 | Selenoprotein P OS=Homo<br>sapiens GN=SEPP1 PE=1 SV=3                                | EGYSN#ISYIVVNHQGISSR                          | known         |
| P49908 | Selenoprotein P OS=Homo<br>sapiens GN=SEPP1 PE=1 SV=3                                | VSEHIPVYQEEEN#QTDVWTLN#GSK                    | known;known   |
| P01833 | Polymeric immunoglobulin<br>receptor OS=Homo sapiens<br>GN=PIGR PE=1 SV=4            | QIGLYPVLVIDSSGYVNP#YTGR                       | known         |
| P01833 | Polymeric immunoglobulin<br>receptor OS=Homo sapiens<br>GN=PIGR PE=1 SV=4            | ANLTNFPEN#GTFVVNIAQLSQDDSGR                   | known         |
| P07358 | Complement component C8<br>beta chain OS=Homo sapiens<br>GN=C8B PE=1 SV=3            | LLCNGDN#DCGDQSDEANCR                          | unknown       |
| O75636 | Ficolin-3 OS=Homo sapiens<br>GN=FCN3 PE=1 SV=2                                       | VELEDFNGN#R                                   | known         |
| Q03591 | Complement factor H-related<br>protein 1 OS=Homo sapiens<br>GN=CFHR1 PE=1 SV=2       | LQNNENN#ISCVER                                | known         |
| Q03591 | Complement factor H-related<br>protein 1 OS=Homo sapiens<br>GN=CFHR1 PE=1 SV=2       | SPYEMFGDEEVMCLNGN#WTEPPQCK                    | known         |
| P19827 | Inter-alpha-trypsin inhibitor<br>heavy chain H1 OS=Homo<br>sapiens GN=ITI1 PE=1 SV=3 | DKICDLLVANNHFAHFFAPQN#LTNMNK                  | known         |

|        |                                                                                         |                                       |             |
|--------|-----------------------------------------------------------------------------------------|---------------------------------------|-------------|
| P51884 | Lumican OS=Homo sapiens<br>GN=LUM PE=1 SV=2                                             | LHINHNN#LTESVGPLPK                    | prediction  |
| Q06033 | Inter-alpha-trypsin inhibitor<br>heavy chain H3 OS=Homo<br>sapiens GN=ITIH3 PE=1 SV=2   | NAHGEEKEN#LTAR                        | known       |
| P02745 | Complement C1q<br>subcomponent subunit A<br>OS=Homo sapiens GN=C1QA<br>PE=1 SV=2        | NPPMGGNVVIFDVTITNQEEPYQN#HSGR         | known       |
| P13671 | Complement component C6<br>OS=Homo sapiens GN=C6 PE=1<br>SV=3                           | KLECGEN#DCGDNSDER                     | unknown     |
| P13671 | Complement component C6<br>OS=Homo sapiens GN=C6 PE=1<br>SV=3                           | KLECGEN#DCGDNSDERDCGR                 | unknown     |
| P22792 | Carboxypeptidase N subunit 2<br>OS=Homo sapiens GN=CPN2<br>PE=1 SV=3                    | LYLGSNN#LTALHPALFQN#LSK               | known;known |
| P09871 | Complement C1s<br>subcomponent OS=Homo<br>sapiens GN=C1S PE=1 SV=1                      | NCGVN#CSGDVFTALIGEIASPNYPKYPENSR      | known       |
| P09871 | Complement C1s<br>subcomponent OS=Homo<br>sapiens GN=C1S PE=1 SV=1                      | YTCEEPYYMENGGGGEYHCAGN#GSWVNEVLGPPLPK | known       |
| P05160 | Coagulation factor XIII B chain<br>OS=Homo sapiens GN=F13B<br>PE=1 SV=3                 | EHETCLAPELYNGN#YSTTQK                 | known       |
| P05160 | Coagulation factor XIII B chain<br>OS=Homo sapiens GN=F13B<br>PE=1 SV=3                 | KEHETCLAPELYNGN#YSTTQK                | known       |
| Q13201 | Multimerin-1 OS=Homo sapiens<br>GN=MMRN1 PE=1 SV=3                                      | LQN#LTLPTN#ASIK                       | known;known |
| Q13201 | Multimerin-1 OS=Homo sapiens<br>GN=MMRN1 PE=1 SV=3                                      | FNPGAESVVLNS#STLK                     | known       |
| P40189 | Interleukin-6 receptor subunit<br>beta OS=Homo sapiens<br>GN=IL6ST PE=1 SV=2            | SHLQN#YTVN#ATK                        | known;known |
| P02760 | Protein AMBP OS=Homo<br>sapiens GN=AMBP PE=1 SV=1                                       | YFYN#GTSMACETFQYGGCMGNGNMFVTEK        | known       |
| Q12913 | Receptor-type tyrosine-protein<br>phosphatase eta OS=Homo<br>sapiens GN=PTPRJ PE=1 SV=3 | IHVAGETDSSNLN#VSEPR                   | known       |
| Q9GZK3 | Olfactory receptor 2B2<br>OS=Homo sapiens GN=OR2B2<br>PE=2 SV=1                         | LHTPMYFFLSNLSLLDLCYTTSTVPQMLVN#ICNTR  | unknown     |
| P08603 | Complement factor H OS=Homo<br>sapiens GN=CFH PE=1 SV=4                                 | WDPEVN#CSMAQIQLCPPPPQIPNSHN#MTTTLNYSR | known;known |
| P10909 | Clusterin OS=Homo sapiens<br>GN=CLU PE=1 SV=1                                           | QLEEFNL#QSSPFYFWMNGDR                 | known       |
| P02745 | Complement C1q<br>subcomponent subunit A<br>OS=Homo sapiens GN=C1QA<br>PE=1 SV=2        | RNPPMGGNVVIFDVTITNQEEPYQN#HSGR        | known       |

|            |                                                                                                                             |                                                  |                     |
|------------|-----------------------------------------------------------------------------------------------------------------------------|--------------------------------------------------|---------------------|
| Q9NU2<br>2 | Midasin OS=Homo sapiens<br>GN=MDN1 PE=1 SV=2                                                                                | IAQFLESVANMFAAAQQLSQN#ISSETAQLLLVSDGRGLFLE<br>GK | unknown             |
| Q9UHR<br>4 | Brain-specific angiogenesis<br>inhibitor 1-associated protein 2-<br>like protein 1 OS=Homo sapiens<br>GN=BAIAP2L1 PE=1 SV=2 | SISTVN#LSEN#SSVVIPPPDYLECLSMGAAADR               | unknown;unknow<br>n |
| Q5XG99     | LysM and putative<br>peptidoglycan-binding domain-<br>containing protein 4 OS=Homo<br>sapiens GN=LYSMD4 PE=2 SV=2           | IQASGETPNSLN#TTVIPN#GSMAMGTVPGQAPR               | unknown;unknow<br>n |
| Q03518     | Antigen peptide transporter 1<br>OS=Homo sapiens GN=TAP1<br>PE=1 SV=2                                                       | QETEFFQQN#QTGNIMSR                               | unknown             |
| Q6ZRQ5     | Protein MMS22-like OS=Homo<br>sapiens GN=MMS22L PE=1 SV=3                                                                   | QVVYGHQFMNLSADNLTN#ISLFEHCETLLCDLISLNR           | unknown             |
| P01023     | Alpha-2-macroglobulin<br>OS=Homo sapiens GN=A2M<br>PE=1 SV=3                                                                | GNEANYYSN#ATTDEHGLVQFSIN#TTNVMGTSLTVR            | known;known         |
| P01042     | Kininogen-1 OS=Homo sapiens<br>GN=KNG1 PE=1 SV=2                                                                            | YNSQN#QSNNQFVLYR                                 | known               |
| P05155     | Plasma protease C1 inhibitor<br>OS=Homo sapiens<br>GN=SERPING1 PE=1 SV=2                                                    | VLSN#NSDANLELINTWVAK                             | known               |
| Q8WZ4<br>2 | Titin OS=Homo sapiens GN=TTN<br>PE=1 SV=4                                                                                   | VNFETTATSTILNIN#ECVR                             | unknown             |
| Q9H8K7     | Uncharacterized protein<br>C10orf88 OS=Homo sapiens<br>GN=C10orf88 PE=2 SV=2                                                | VSDNSNIPNSELLPFLQN#LCSQVNHLHVGNK                 | unknown             |
| Q9P266     | Junctional protein associated<br>with coronary artery disease<br>OS=Homo sapiens<br>GN=KIAA1462 PE=1 SV=3                   | SPPQNIPNPYLEDTVPI#VCGGHSQQSQSPTK                 | unknown             |
| Q9P2D1     | Chromodomain-helicase-DNA-<br>binding protein 7 OS=Homo<br>sapiens GN=CHD7 PE=1 SV=3                                        | YPYSLNLQGLVN#NTGMNQNLGLTNTPMNQSVPR               | unknown             |
| P01009     | Alpha-1-antitrypsin OS=Homo<br>sapiens GN=SERPINA1 PE=1<br>SV=3                                                             | YLG#ATAIFFLPDEGK                                 | known               |
| POC0L4     | Complement C4-A OS=Homo<br>sapiens GN=C4A PE=1 SV=1                                                                         | GLN#VTLSTGR                                      | known               |
| POC0L4     | Complement C4-A OS=Homo<br>sapiens GN=C4A PE=1 SV=1                                                                         | N#TTCQDLQIEVTVK                                  | known               |
| POC0L4     | Complement C4-A OS=Homo<br>sapiens GN=C4A PE=1 SV=1                                                                         | FSDGLESN#SSTQFEVK                                | known               |
| POC0L5     | Complement C4-B OS=Homo<br>sapiens GN=C4B PE=1 SV=1                                                                         | GLN#VTLSTGR                                      | known               |
| POC0L5     | Complement C4-B OS=Homo<br>sapiens GN=C4B PE=1 SV=1                                                                         | N#TTCQDLQIEVTVK                                  | known               |
| POC0L5     | Complement C4-B OS=Homo<br>sapiens GN=C4B PE=1 SV=1                                                                         | FSDGLESN#SSTQFEVK                                | known               |

|        |                                                                      |                                    |            |
|--------|----------------------------------------------------------------------|------------------------------------|------------|
| P01023 | Alpha-2-macroglobulin<br>OS=Homo sapiens GN=A2M<br>PE=1 SV=3         | VSN#QTLSLFFTVLQDVPVR               | known      |
| P01023 | Alpha-2-macroglobulin<br>OS=Homo sapiens GN=A2M<br>PE=1 SV=3         | GCVLLSYLN#ETVTVSASLESVR            | known      |
| P01023 | Alpha-2-macroglobulin<br>OS=Homo sapiens GN=A2M<br>PE=1 SV=3         | IITILEEEMN#VSVCGLYTYGKVPVGHVTVSICR | known      |
| P01857 | Ig gamma-1 chain C region<br>OS=Homo sapiens GN=IGHG1<br>PE=1 SV=1   | EEQYN#STYR                         | known      |
| P01857 | Ig gamma-1 chain C region<br>OS=Homo sapiens GN=IGHG1<br>PE=1 SV=1   | TKPREEQYN#STYR                     | known      |
| P01859 | Ig gamma-2 chain C region<br>OS=Homo sapiens GN=IGHG2<br>PE=1 SV=2   | EEQFN#STFR                         | known      |
| P04114 | Apolipoprotein B-100 OS=Homo<br>sapiens GN=APOB PE=1 SV=2            | YDFN#SSMLYSTAK                     | known      |
| P04114 | Apolipoprotein B-100 OS=Homo<br>sapiens GN=APOB PE=1 SV=2            | FVEGSHN#STVSLTTK                   | known      |
| P04114 | Apolipoprotein B-100 OS=Homo<br>sapiens GN=APOB PE=1 SV=2            | FEVDSPVYN#ATWSASLK                 | known      |
| P04114 | Apolipoprotein B-100 OS=Homo<br>sapiens GN=APOB PE=1 SV=2            | QVLFLDTVYGN#CSTHFTVK               | known      |
| P04114 | Apolipoprotein B-100 OS=Homo<br>sapiens GN=APOB PE=1 SV=2            | IQSPLFTLDANADIGN#GTTSANEAGIAASITAK | known      |
| P04114 | Apolipoprotein B-100 OS=Homo<br>sapiens GN=APOB PE=1 SV=2            | QVFPGLNYCTSGAYSN#ASSTDSASYPLTGDTR  | prediction |
| P01011 | Alpha-1-antichymotrypsin<br>OS=Homo sapiens<br>GN=SERPINA3 PE=1 SV=2 | YTGN#ASALFILPDQDK                  | known      |
| P01011 | Alpha-1-antichymotrypsin<br>OS=Homo sapiens<br>GN=SERPINA3 PE=1 SV=2 | FN#LTETSEAEIHQSFQHLLR              | known      |
| P00738 | Haptoglobin OS=Homo sapiens<br>GN=HP PE=1 SV=1                       | NLFLN#HSENATAK                     | known      |
| P00738 | Haptoglobin OS=Homo sapiens<br>GN=HP PE=1 SV=1                       | VVLHPN#YSQVDIGLIK                  | known      |
| P01871 | Ig mu chain C region OS=Homo<br>sapiens GN=IGHM PE=1 SV=3            | GLTFQQN#ASSMCPDQDPAIR              | known      |
| P01871 | Ig mu chain C region OS=Homo<br>sapiens GN=IGHM PE=1 SV=3            | STGKPTLYN#VSLVMSDAGTCY             | known      |
| P01871 | Ig mu chain C region OS=Homo<br>sapiens GN=IGHM PE=1 SV=3            | THTN#ISESHPNATFSAVGEASICEDDWNSGER  | known      |

|        |                                                                     |                             |       |
|--------|---------------------------------------------------------------------|-----------------------------|-------|
| P02763 | Alpha-1-acid glycoprotein 1<br>OS=Homo sapiens GN=ORM1<br>PE=1 SV=1 | EN#GTISR                    | known |
| P02763 | Alpha-1-acid glycoprotein 1<br>OS=Homo sapiens GN=ORM1<br>PE=1 SV=1 | SVQEIQATFFYFTPN#K           | known |
| P02763 | Alpha-1-acid glycoprotein 1<br>OS=Homo sapiens GN=ORM1<br>PE=1 SV=1 | SVQEIQATFFYFTPN#KTEDTIFLR   | known |
| P02766 | Transthyretin OS=Homo sapiens<br>GN=TTR PE=1 SV=1                   | ALGISPFHEHAEVVFTAN#DSGPR    | known |
| P02787 | Serotransferrin OS=Homo sapiens<br>GN=TF PE=1 SV=3                  | QQQLFGSN#VTDCSGNFCLFR       | known |
| P01860 | Ig gamma-3 chain C region<br>OS=Homo sapiens GN=IGHG3<br>PE=1 SV=2  | EEQYN#STFR                  | known |
| P01008 | Antithrombin-III OS=Homo sapiens<br>GN=SERPINC1 PE=1 SV=1           | LGACN#DTLQQLMEVFK           | known |
| P01008 | Antithrombin-III OS=Homo sapiens<br>GN=SERPINC1 PE=1 SV=1           | SLTFN#ETYQDISELVYGAK        | known |
| P00450 | Ceruloplasmin OS=Homo sapiens<br>GN=CP PE=1 SV=1                    | AGLQAFFVQECN#K              | known |
| P00450 | Ceruloplasmin OS=Homo sapiens<br>GN=CP PE=1 SV=1                    | EHEGAIYPDN#TTDFQR           | known |
| P00450 | Ceruloplasmin OS=Homo sapiens<br>GN=CP PE=1 SV=1                    | EN#LTAPGSDSAVFEQGTTR        | known |
| P08603 | Complement factor H OS=Homo sapiens<br>GN=CFH PE=1 SV=4             | SPDVIN#GSPISQK              | known |
| P08603 | Complement factor H OS=Homo sapiens<br>GN=CFH PE=1 SV=4             | ISEEN#ETTCYMGK              | known |
| P08603 | Complement factor H OS=Homo sapiens<br>GN=CFH PE=1 SV=4             | IPCSQPPQIEHGTIN#SSR         | known |
| P01876 | Ig alpha-1 chain C region<br>OS=Homo sapiens GN=IGHA1<br>PE=1 SV=2  | LAGKPTHVN#VSVVMAEVDGTCY     | known |
| P01876 | Ig alpha-1 chain C region<br>OS=Homo sapiens GN=IGHA1<br>PE=1 SV=2  | LSLHRPALEDLLLSEAN#LTCTLTGLR | known |
| P02790 | Hemopexin OS=Homo sapiens<br>GN=HPX PE=1 SV=2                       | SWPAVGN#CSSALR              | known |
| P02790 | Hemopexin OS=Homo sapiens<br>GN=HPX PE=1 SV=2                       | ALPQPQN#VTSLLGCTH           | known |
| P02790 | Hemopexin OS=Homo sapiens<br>GN=HPX PE=1 SV=2                       | CSDGWSFDATLDDN#GTMLFFK      | known |

|        |                                                                          |                                    |         |
|--------|--------------------------------------------------------------------------|------------------------------------|---------|
| P01861 | Ig gamma-4 chain C region<br>OS=Homo sapiens GN=IGHG4<br>PE=1 SV=1       | EEQFN#STYR                         | known   |
| P19652 | Alpha-1-acid glycoprotein 2<br>OS=Homo sapiens GN=ORM2<br>PE=1 SV=2      | SVQEIQATFFYFTPN#K                  | known   |
| P19652 | Alpha-1-acid glycoprotein 2<br>OS=Homo sapiens GN=ORM2<br>PE=1 SV=2      | SVQEIQATFFYFTPN#KTEDTIFLR          | known   |
| P02765 | Alpha-2-HS-glycoprotein<br>OS=Homo sapiens GN=AHSG<br>PE=1 SV=1          | VCQDCPLLAPLN#DTR                   | known   |
| P02765 | Alpha-2-HS-glycoprotein<br>OS=Homo sapiens GN=AHSG<br>PE=1 SV=1          | KVCQDCPLLAPLN#DTR                  | known   |
| P01042 | Kininogen-1 OS=Homo sapiens<br>GN=KNG1 PE=1 SV=2                         | ITYSIVQTN#CSK                      | known   |
| P01042 | Kininogen-1 OS=Homo sapiens<br>GN=KNG1 PE=1 SV=2                         | KYNSQN#QSNNQFVLYR                  | known   |
| P05090 | Apolipoprotein D OS=Homo<br>sapiens GN=APOD PE=1 SV=1                    | ADGTVNQIEGEATPVN#LTEPAKLEVK        | known   |
| P25311 | Zinc-alpha-2-glycoprotein<br>OS=Homo sapiens GN=AZGP1<br>PE=1 SV=2       | DIVEYNDNSN#GSHVLQGR                | known   |
| P05155 | Plasma protease C1 inhibitor<br>OS=Homo sapiens<br>GN=SERPING1 PE=1 SV=2 | DTFVN#ASR                          | known   |
| P05155 | Plasma protease C1 inhibitor<br>OS=Homo sapiens<br>GN=SERPING1 PE=1 SV=2 | ASSNP#ATSSSSQDPESLQDR              | known   |
| P05155 | Plasma protease C1 inhibitor<br>OS=Homo sapiens<br>GN=SERPING1 PE=1 SV=2 | VGQLQLSHN#LSLVILVPQNLK             | known   |
| P04220 | Ig mu heavy chain disease<br>protein OS=Homo sapiens PE=1<br>SV=1        | STGKPTLYN#VSLVMSDTAGTCY            | unknown |
| P04220 | Ig mu heavy chain disease<br>protein OS=Homo sapiens PE=1<br>SV=1        | THTN#ISESHPNATFSAVGEASICEDDWDSDGER | unknown |
| Q08380 | Galectin-3-binding protein<br>OS=Homo sapiens<br>GN=LGALS3BP PE=1 SV=1   | DAGVVCTN#ETR                       | known   |
| Q08380 | Galectin-3-binding protein<br>OS=Homo sapiens<br>GN=LGALS3BP PE=1 SV=1   | AAIPSALDTN#SSK                     | known   |
| Q08380 | Galectin-3-binding protein<br>OS=Homo sapiens<br>GN=LGALS3BP PE=1 SV=1   | ALGFEN#ATQALGR                     | known   |
| Q08380 | Galectin-3-binding protein<br>OS=Homo sapiens<br>GN=LGALS3BP PE=1 SV=1   | GLN#LTEDTYKPR                      | known   |
| Q08380 | Galectin-3-binding protein<br>OS=Homo sapiens<br>GN=LGALS3BP PE=1 SV=1   | TVIRPFYLTN#SSGVD                   | known   |

|        |                                                                                    |                                               |         |
|--------|------------------------------------------------------------------------------------|-----------------------------------------------|---------|
| Q08380 | Galectin-3-binding protein<br>OS=Homo sapiens<br>GN=LGALS3BP PE=1 SV=1             | EPGSN#VTMSVDAECVPMVR                          | known   |
| P02749 | Beta-2-glycoprotein 1 OS=Homo sapiens<br>GN=APOH PE=1 SV=3                         | LGN#WSAMPSCK                                  | known   |
| P19823 | Inter-alpha-trypsin inhibitor heavy chain H2 OS=Homo sapiens<br>GN=ITIH2 PE=1 SV=2 | GAFISN#FSMTVDGK                               | known   |
| P01877 | Ig alpha-2 chain C region OS=Homo sapiens<br>GN=IGHA2 PE=1 SV=3                    | TPLTAN#ITK                                    | known   |
| P01877 | Ig alpha-2 chain C region OS=Homo sapiens<br>GN=IGHA2 PE=1 SV=3                    | LSLHRPALEDLLGSEAN#LTCTLTGLR                   | known   |
| P01877 | Ig alpha-2 chain C region OS=Homo sapiens<br>GN=IGHA2 PE=1 SV=3                    | VFPLSLDSTPQDGNVVVACLVQGFFPQEPLSVTWSESGQN#VTAR | known   |
| P04004 | Vitronectin OS=Homo sapiens<br>GN=VTN PE=1 SV=1                                    | N#GSLFAFR                                     | known   |
| Q14624 | Inter-alpha-trypsin inhibitor heavy chain H4 OS=Homo sapiens<br>GN=ITIH4 PE=1 SV=4 | AFITN#FSMIIDGMTYPGIK                          | known   |
| Q14624 | Inter-alpha-trypsin inhibitor heavy chain H4 OS=Homo sapiens<br>GN=ITIH4 PE=1 SV=4 | LPTQN#ITFQTESSVAEQEAEFQSPK                    | known   |
| P07357 | Complement component C8 alpha chain OS=Homo sapiens<br>GN=C8A PE=1 SV=2            | GGSSGWSGGLAQN#R                               | known   |
| P00751 | Complement factor B OS=Homo sapiens<br>GN=CFB PE=1 SV=2                            | ALQAVYSMMSWPDDVPPEGWN#R                       | known   |
| P00751 | Complement factor B OS=Homo sapiens<br>GN=CFB PE=1 SV=2                            | SPYYN#VSDEISFHCYDGYTLR                        | known   |
| P01591 | Immunoglobulin J chain OS=Homo sapiens<br>GN=IGJ PE=1 SV=4                         | EN#ISDPTSPLR                                  | known   |
| P01591 | Immunoglobulin J chain OS=Homo sapiens<br>GN=IGJ PE=1 SV=4                         | IIVPLNNREN#ISDPTSPLR                          | known   |
| P01591 | Immunoglobulin J chain OS=Homo sapiens<br>GN=IGJ PE=1 SV=4                         | CDPTEVELDNQIVTATQSN#ICDEDSATETCYTYDR          | unknown |
| P08185 | Corticosteroid-binding globulin OS=Homo sapiens<br>GN=SERPINA6 PE=1 SV=1           | AQLLQGLGFN#LTER                               | known   |
| P10909 | Clusterin OS=Homo sapiens<br>GN=CLU PE=1 SV=1                                      | HN#STGCLR                                     | known   |
| P10909 | Clusterin OS=Homo sapiens<br>GN=CLU PE=1 SV=1                                      | EDALN#ETR                                     | known   |
| P10909 | Clusterin OS=Homo sapiens<br>GN=CLU PE=1 SV=1                                      | KKEDALN#ETR                                   | known   |

|        |                                                                         |                               |            |
|--------|-------------------------------------------------------------------------|-------------------------------|------------|
| P10909 | Clusterin OS=Homo sapiens<br>GN=CLU PE=1 SV=1                           | LAN#LTQGEDQYYLR               | known      |
| P10909 | Clusterin OS=Homo sapiens<br>GN=CLU PE=1 SV=1                           | ELPGVCN#ETMMALWEECKPCLK       | known      |
| P10909 | Clusterin OS=Homo sapiens<br>GN=CLU PE=1 SV=1                           | LKELPGVCN#ETMMALWEECKPCLK     | known      |
| O75882 | Attractin OS=Homo sapiens<br>GN=ATRN PE=1 SV=2                          | EWLPLN#R                      | known      |
| O75882 | Attractin OS=Homo sapiens<br>GN=ATRN PE=1 SV=2                          | GICN#SSDVR                    | known      |
| O75882 | Attractin OS=Homo sapiens<br>GN=ATRN PE=1 SV=2                          | CIN#QSICEK                    | known      |
| O75882 | Attractin OS=Homo sapiens<br>GN=ATRN PE=1 SV=2                          | DLDMFIN#ASK                   | known      |
| O75882 | Attractin OS=Homo sapiens<br>GN=ATRN PE=1 SV=2                          | N#HSCSEGGQISIFR               | known      |
| O75882 | Attractin OS=Homo sapiens<br>GN=ATRN PE=1 SV=2                          | ISN#SSDTVECECSENWK            | known      |
| O75882 | Attractin OS=Homo sapiens<br>GN=ATRN PE=1 SV=2                          | MPSQAPTGNFYQPQLLN#SSMCLEDSR   | known      |
| O75882 | Attractin OS=Homo sapiens<br>GN=ATRN PE=1 SV=2                          | GCSCFSDWQGGPGCSVPVAPAN#QSFWTR | prediction |
| P04275 | von Willebrand factor OS=Homo sapiens<br>GN=VWF PE=1 SV=4               | IGEADFN#R                     | known      |
| P04275 | von Willebrand factor OS=Homo sapiens<br>GN=VWF PE=1 SV=4               | MEACMLN#GTVIGPGK              | prediction |
| P04275 | von Willebrand factor OS=Homo sapiens<br>GN=VWF PE=1 SV=4               | ASPPSSCN#ISSGEMQK             | prediction |
| P04275 | von Willebrand factor OS=Homo sapiens<br>GN=VWF PE=1 SV=4               | N#VSCPQLEVPVCPSPGFQLSCK       | known      |
| P04275 | von Willebrand factor OS=Homo sapiens<br>GN=VWF PE=1 SV=4               | GLQPTLTNPGEGRPN#FTCACR        | prediction |
| P04275 | von Willebrand factor OS=Homo sapiens<br>GN=VWF PE=1 SV=4               | TTCNCPGLYKEEN#NTGECCGR        | unknown    |
| P04275 | von Willebrand factor OS=Homo sapiens<br>GN=VWF PE=1 SV=4               | HCDGN#VSSCGDHPSEGCFPPDK       | prediction |
| P20851 | C4b-binding protein beta chain<br>OS=Homo sapiens GN=C4BPB<br>PE=1 SV=1 | TLFCN#ASK                     | known      |



|        |                                                                            |                                       |         |
|--------|----------------------------------------------------------------------------|---------------------------------------|---------|
| P20851 | C4b-binding protein beta chain<br>OS=Homo sapiens GN=C4BPB<br>PE=1 SV=1    | EWDN#TTTECR                           | known   |
| P04003 | C4b-binding protein alpha chain<br>OS=Homo sapiens GN=C4BPA<br>PE=1 SV=2   | SRPAN#HCVYFYGDEISFSCHETSR             | unknown |
| P04003 | C4b-binding protein alpha chain<br>OS=Homo sapiens GN=C4BPA<br>PE=1 SV=2   | FSLLGHASISCTVEN#ETIGVWRPSPPTCEK       | known   |
| P04003 | C4b-binding protein alpha chain<br>OS=Homo sapiens GN=C4BPA<br>PE=1 SV=2   | LSVDKDQYVEPEN#VTIQCDSGYGVVGPQSITCSGMR | known   |
| P04196 | Histidine-rich glycoprotein<br>OS=Homo sapiens GN=HRG<br>PE=1 SV=1         | HSHNN#NSSDLPHK                        | known   |
| P04196 | Histidine-rich glycoprotein<br>OS=Homo sapiens GN=HRG<br>PE=1 SV=1         | VEN#TTVYYLVLDVQESDCSVLSR              | known   |
| P04196 | Histidine-rich glycoprotein<br>OS=Homo sapiens GN=HRG<br>PE=1 SV=1         | IADAHLDVRN#TTVYYLVLDVQESDCSVLSR       | known   |
| P05546 | Heparin cofactor 2 OS=Homo<br>sapiens GN=SERPIND1 PE=1<br>SV=3             | DFVN#ASSK                             | known   |
| P05546 | Heparin cofactor 2 OS=Homo<br>sapiens GN=SERPIND1 PE=1<br>SV=3             | N#LSMPLLPADFK                         | known   |
| P06681 | Complement C2 OS=Homo<br>sapiens GN=C2 PE=1 SV=2                           | TMFPN#LTDVR                           | known   |
| P06681 | Complement C2 OS=Homo<br>sapiens GN=C2 PE=1 SV=2                           | QSVPAHFVALN#GSK                       | known   |
| P06681 | Complement C2 OS=Homo<br>sapiens GN=C2 PE=1 SV=2                           | LTDTICGVGNMSAN#ASDQER                 | known   |
| P10643 | Complement component C7<br>OS=Homo sapiens GN=C7 PE=1<br>SV=2              | N#YTLTGR                              | known   |
| P10643 | Complement component C7<br>OS=Homo sapiens GN=C7 PE=1<br>SV=2              | INNDFNIEFYN#STWSYVK                   | known   |
| P02750 | Leucine-rich alpha-2-<br>glycoprotein OS=Homo sapiens<br>GN=LRG1 PE=1 SV=2 | MFSQN#DTR                             | known   |
| P02750 | Leucine-rich alpha-2-<br>glycoprotein OS=Homo sapiens<br>GN=LRG1 PE=1 SV=2 | KLPPGLLAN#FTLLR                       | known   |
| P43251 | Biotinidase OS=Homo sapiens<br>GN=BTD PE=1 SV=2                            | FN#DTEVLQR                            | known   |
| P43251 | Biotinidase OS=Homo sapiens<br>GN=BTD PE=1 SV=2                            | NPVGLIGAEN#ATGETDPSHSK                | known   |
| P43251 | Biotinidase OS=Homo sapiens<br>GN=BTD PE=1 SV=2                            | DVQIIVFPEDGIHGFN#FTR                  | known   |

|        |                                                                        |                                              |            |
|--------|------------------------------------------------------------------------|----------------------------------------------|------------|
| P43251 | Biotinidase OS=Homo sapiens<br>GN=BTD PE=1 SV=2                        | WNPCLEPHRFN#DTEVLQR                          | known      |
| P43251 | Biotinidase OS=Homo sapiens<br>GN=BTD PE=1 SV=2                        | WNVNAPPTFHSEMMDN#FTLVPVWGK                   | known      |
| P04217 | Alpha-1B-glycoprotein<br>OS=Homo sapiens GN=A1BG<br>PE=1 SV=4          | EGDHEFLEVPEAQEDVEATFPVHQPGN#YSCSYR           | known      |
| P04217 | Alpha-1B-glycoprotein<br>OS=Homo sapiens GN=A1BG<br>PE=1 SV=4          | REGDHEFLEVPEAQEDVEATFPVHQPGN#YSCSYR          | known      |
| P04217 | Alpha-1B-glycoprotein<br>OS=Homo sapiens GN=A1BG<br>PE=1 SV=4          | FQSPAGTEALFELHNISVADSAN#YSCVYVDLKPFFGGSAPSER | known      |
| P02748 | Complement component C9<br>OS=Homo sapiens GN=C9 PE=1<br>SV=2          | N#ETYQLFLSYSSK                               | known      |
| P02748 | Complement component C9<br>OS=Homo sapiens GN=C9 PE=1<br>SV=2          | AVN#ITSENLIIDVVSLIR                          | known      |
| P05543 | Thyroxine-binding globulin<br>OS=Homo sapiens<br>GN=SERPINA7 PE=1 SV=2 | VTACHSSQPN#ATLYK                             | known      |
| P05543 | Thyroxine-binding globulin<br>OS=Homo sapiens<br>GN=SERPINA7 PE=1 SV=2 | TLYETEVEFSTDFSN#ISAAK                        | known      |
| P55058 | Phospholipid transfer protein<br>OS=Homo sapiens GN=PLTP<br>PE=1 SV=1  | N#WSLPNR                                     | known      |
| P55058 | Phospholipid transfer protein<br>OS=Homo sapiens GN=PLTP<br>PE=1 SV=1  | VSN#VSCQASVSR                                | known      |
| P55058 | Phospholipid transfer protein<br>OS=Homo sapiens GN=PLTP<br>PE=1 SV=1  | EGHFYFN#ISEVK                                | known      |
| P55058 | Phospholipid transfer protein<br>OS=Homo sapiens GN=PLTP<br>PE=1 SV=1  | IYSN#HSALESALALIPLQAPLK                      | known      |
| P00734 | Prothrombin OS=Homo sapiens<br>GN=F2 PE=1 SV=2                         | GHVN#ITR                                     | known      |
| P00734 | Prothrombin OS=Homo sapiens<br>GN=F2 PE=1 SV=2                         | YPHKPEIN#STTHPGADLQENFCR                     | known      |
| P00734 | Prothrombin OS=Homo sapiens<br>GN=F2 PE=1 SV=2                         | WVLTAAHCLLYPPWDKN#FTENDLLVR                  | known      |
| P05156 | Complement factor I OS=Homo<br>sapiens GN=CFI PE=1 SV=2                | LISN#CSK                                     | prediction |
| P05156 | Complement factor I OS=Homo<br>sapiens GN=CFI PE=1 SV=2                | N#GTAVCATNR                                  | known      |
| P05156 | Complement factor I OS=Homo<br>sapiens GN=CFI PE=1 SV=2                | LSDLSIN#STECLHVHCR                           | known      |

|        |                                                                     |                                   |               |
|--------|---------------------------------------------------------------------|-----------------------------------|---------------|
| P05156 | Complement factor I OS=Homo sapiens GN=CFI PE=1 SV=2                | ACDGIN#DCGDQSDDELCK               | unknown       |
| P02751 | Fibronectin OS=Homo sapiens GN=FN1 PE=1 SV=4                        | HEEGHMLN#CTCFGQGR                 | known         |
| P02751 | Fibronectin OS=Homo sapiens GN=FN1 PE=1 SV=4                        | DQCIVDDITYNVN#DTFHK               | known         |
| P01616 | Ig kappa chain V-II region MIL OS=Homo sapiens PE=1 SV=1            | FSGSGSGTN#FTLK                    | unknown       |
| P43652 | Afamin OS=Homo sapiens GN=AFM PE=1 SV=1                             | HN#FSHCCSK                        | known         |
| P43652 | Afamin OS=Homo sapiens GN=AFM PE=1 SV=1                             | YAEDKFN#ETTEK                     | known         |
| P49908 | Selenoprotein P OS=Homo sapiens GN=SEPP1 PE=1 SV=3                  | CGN#CSLTTLK                       | By similarity |
| P49908 | Selenoprotein P OS=Homo sapiens GN=SEPP1 PE=1 SV=3                  | CGN#CSLTTLKDEDFCK                 | By similarity |
| P49908 | Selenoprotein P OS=Homo sapiens GN=SEPP1 PE=1 SV=3                  | VSEHIPVYQEEEN#QTDVWTLNGSK         | known         |
| O95497 | Pantetheinase OS=Homo sapiens GN=VNN1 PE=1 SV=2                     | MTGSGIYAPN#SSR                    | known         |
| O95497 | Pantetheinase OS=Homo sapiens GN=VNN1 PE=1 SV=2                     | LTGVAGN#YTVQCQK                   | known         |
| O95497 | Pantetheinase OS=Homo sapiens GN=VNN1 PE=1 SV=2                     | LLLSQLDShPSHAVVN#WTSYASSIEALSSGNK | known         |
| P27169 | Serum paraoxonase/arylesterase 1 OS=Homo sapiens GN=PON1 PE=1 SV=3  | HAN#WTLTPLK                       | known         |
| P27169 | Serum paraoxonase/arylesterase 1 OS=Homo sapiens GN=PON1 PE=1 SV=3  | VTQVYAEN#GTVLQGSTVASVYK           | known         |
| P01833 | Polymeric immunoglobulin receptor OS=Homo sapiens GN=PIGR PE=1 SV=4 | VPGN#VTAVLGETLK                   | known         |
| P01833 | Polymeric immunoglobulin receptor OS=Homo sapiens GN=PIGR PE=1 SV=4 | WN#NTGCQALPSQDEGPSK               | known         |
| P03952 | Plasma kallikrein OS=Homo sapiens GN=KLKB1 PE=1 SV=1                | GVNFN#VSK                         | known         |
| P03952 | Plasma kallikrein OS=Homo sapiens GN=KLKB1 PE=1 SV=1                | GVN#VCQETCTK                      | unknown       |
| P03952 | Plasma kallikrein OS=Homo sapiens GN=KLKB1 PE=1 SV=1                | IYSGILN#LSDITK                    | known         |

|        |                                                                                 |                            |            |
|--------|---------------------------------------------------------------------------------|----------------------------|------------|
| P03952 | Plasma kallikrein OS=Homo sapiens GN=KLKB1 PE=1 SV=1                            | IYPGVDFGGEELN#VTFVK        | known      |
| P03952 | Plasma kallikrein OS=Homo sapiens GN=KLKB1 PE=1 SV=1                            | LQAPLN#YTEFQKPICLPSK       | known      |
| P03952 | Plasma kallikrein OS=Homo sapiens GN=KLKB1 PE=1 SV=1                            | IVGGTN#SSWGEWPWQVSLQVK     | known      |
| P29622 | Kallistatin OS=Homo sapiens GN=SERPINA4 PE=1 SV=3                               | DFYVDEN#TTVR               | known      |
| P29622 | Kallistatin OS=Homo sapiens GN=SERPINA4 PE=1 SV=3                               | FLN#DTMAVYEAK              | known      |
| P29622 | Kallistatin OS=Homo sapiens GN=SERPINA4 PE=1 SV=3                               | SQILEGLGFN#LTELSESDVHR     | known      |
| P07996 | Thrombospondin-1 OS=Homo sapiens GN=THBS1 PE=1 SV=2                             | VVN#STTGPEHLR              | known      |
| P07996 | Thrombospondin-1 OS=Homo sapiens GN=THBS1 PE=1 SV=2                             | VSCPIMPSCN#ATVPDGECCPR     | prediction |
| P19827 | Inter-alpha-trypsin inhibitor heavy chain H1 OS=Homo sapiens GN=ITIH1 PE=1 SV=3 | ICDLLVANNHFAHFFAPQN#LTNMNK | known      |
| P51884 | Lumican OS=Homo sapiens GN=LUM PE=1 SV=2                                        | KLHINHNN#LTESVGPLPK        | prediction |
| P51884 | Lumican OS=Homo sapiens GN=LUM PE=1 SV=2                                        | LGSFEGLVN#LTFIHLQHNR       | known      |
| P51884 | Lumican OS=Homo sapiens GN=LUM PE=1 SV=2                                        | AFEN#VTDLQWLILDHNLENSK     | known      |
| O95445 | Apolipoprotein M OS=Homo sapiens GN=APOM PE=1 SV=2                              | TELFSSSCP GGIMLN#ETGQGYQR  | known      |
| Q9Y6R7 | IgGfC-binding protein OS=Homo sapiens GN=FCGBP PE=1 SV=3                        | N#ECGILADPK                | unknown    |
| Q9Y6R7 | IgGfC-binding protein OS=Homo sapiens GN=FCGBP PE=1 SV=3                        | VITVQVAN#FTLR              | known      |
| Q9Y6R7 | IgGfC-binding protein OS=Homo sapiens GN=FCGBP PE=1 SV=3                        | SVTLQIYN#HSLTLSAR          | known      |
| Q9Y6R7 | IgGfC-binding protein OS=Homo sapiens GN=FCGBP PE=1 SV=3                        | YLPVN#SLLTSDCSER           | unknown    |
| P04278 | Sex hormone-binding globulin OS=Homo sapiens GN=SHBG PE=1 SV=2                  | LDVDQALN#R                 | known      |
| P04278 | Sex hormone-binding globulin OS=Homo sapiens GN=SHBG PE=1 SV=2                  | SHEIWITHSCPSQPN#GTDASH     | known      |

|        |                                                                                         |                         |            |
|--------|-----------------------------------------------------------------------------------------|-------------------------|------------|
| Q8TF66 | Leucine-rich repeat-containing protein 15 OS=Homo sapiens GN=LRRRC15 PE=1 SV=2          | MLANLQN#ISLQNNR         | prediction |
| P80108 | Phosphatidylinositol-glycan-specific phospholipase D OS=Homo sapiens GN=GPLD1 PE=1 SV=3 | LNVEAAN#WTVR            | prediction |
| P80108 | Phosphatidylinositol-glycan-specific phospholipase D OS=Homo sapiens GN=GPLD1 PE=1 SV=3 | N#LTTSLTESVDR           | prediction |
| P80108 | Phosphatidylinositol-glycan-specific phospholipase D OS=Homo sapiens GN=GPLD1 PE=1 SV=3 | LGTSLSGGHVLMMN#GTLK     | known      |
| Q06033 | Inter-alpha-trypsin inhibitor heavy chain H3 OS=Homo sapiens GN=ITIH3 PE=1 SV=2         | KNAHGEEKEN#LTAR         | known      |
| P05154 | Plasma serine protease inhibitor OS=Homo sapiens GN=SERPINA5 PE=1 SV=3                  | VVGVPYQGN#ATALFILPSEGK  | known      |
| P01596 | Ig kappa chain V-I region CAR OS=Homo sapiens PE=1 SV=1                                 | ASQN#ISSWLAWYQQKPGK     | known      |
| P00748 | Coagulation factor XII OS=Homo sapiens GN=F12 PE=1 SV=3                                 | N#HSCEPCQTLAVR          | known      |
| P00748 | Coagulation factor XII OS=Homo sapiens GN=F12 PE=1 SV=3                                 | RN#HSCEPCQTLAVR         | known      |
| P23142 | Fibulin-1 OS=Homo sapiens GN=FBLN1 PE=1 SV=4                                            | CATPHGDN#ASLEATFVK      | known      |
| Q9BY67 | Cell adhesion molecule 1 OS=Homo sapiens GN=CADM1 PE=1 SV=2                             | VSLTN#VVISDEGR          | known      |
| Q9BY67 | Cell adhesion molecule 1 OS=Homo sapiens GN=CADM1 PE=1 SV=2                             | FQLLN#FSSSELK           | known      |
| P13671 | Complement component C6 OS=Homo sapiens GN=C6 PE=1 SV=3                                 | VLN#FTTK                | known      |
| Q86VB7 | Scavenger receptor cysteine-rich type 1 protein M130 OS=Homo sapiens GN=CD163 PE=1 SV=2 | GN#ESALWDCK             | unknown    |
| Q86VB7 | Scavenger receptor cysteine-rich type 1 protein M130 OS=Homo sapiens GN=CD163 PE=1 SV=2 | EDAAVN#CTDISVQK         | known      |
| Q86VB7 | Scavenger receptor cysteine-rich type 1 protein M130 OS=Homo sapiens GN=CD163 PE=1 SV=2 | HSN#CTHQDAGVTCSDGSNLEMR | known      |
| Q9UGM5 | Fetuin-B OS=Homo sapiens GN=FETUB PE=1 SV=2                                             | VLYLAAYN#CTLRPVSK       | known      |
| P22792 | Carboxypeptidase N subunit 2 OS=Homo sapiens GN=CPN2 PE=1 SV=3                          | AFGSNPN#LTK             | prediction |
| P05362 | Intercellular adhesion molecule 1 OS=Homo sapiens GN=ICAM1 PE=1 SV=2                    | AN#LTVVLLR              | known      |

|        |                                                                                  |                        |            |
|--------|----------------------------------------------------------------------------------|------------------------|------------|
| P05362 | Intercellular adhesion molecule 1 OS=Homo sapiens GN=ICAM1 PE=1 SV=2             | DHHGAN#FSCR            | known      |
| P05362 | Intercellular adhesion molecule 1 OS=Homo sapiens GN=ICAM1 PE=1 SV=2             | LNPTVTYGN#DSFSAK       | known      |
| P05160 | Coagulation factor XIII B chain OS=Homo sapiens GN=F13B PE=1 SV=3                | HGVIISSTVDTYEN#GSSVEYR | known      |
| Q9UK55 | Protein Z-dependent protease inhibitor OS=Homo sapiens GN=SERPINA10 PE=1 SV=1    | ETFFN#LSK              | known      |
| P17936 | Insulin-like growth factor-binding protein 3 OS=Homo sapiens GN=IGFBP3 PE=1 SV=2 | GLCVN#ASAVSR           | known      |
| Q96PD5 | N-acetylmuramoyl-L-alanine amidase OS=Homo sapiens GN=PGLYRP2 PE=1 SV=1          | GFGVAIVGN#YTAALPTEAALR | known      |
| Q13201 | Multimerin-1 OS=Homo sapiens GN=MMRN1 PE=1 SV=3                                  | HPFTGDN#CTIK           | prediction |
| Q13201 | Multimerin-1 OS=Homo sapiens GN=MMRN1 PE=1 SV=3                                  | TQAALSN#LTCCIDR        | prediction |
| Q9ULI3 | Protein HEG homolog 1 OS=Homo sapiens GN=HEG1 PE=1 SV=3                          | N#SSGPDLSWLHFYR        | unknown    |
| P13473 | Lysosome-associated membrane glycoprotein 2 OS=Homo sapiens GN=LAMP2 PE=1 SV=2   | WQMN#FTVR              | known      |
| P13473 | Lysosome-associated membrane glycoprotein 2 OS=Homo sapiens GN=LAMP2 PE=1 SV=2   | VQPFN#VTQ GK           | known      |
| P13473 | Lysosome-associated membrane glycoprotein 2 OS=Homo sapiens GN=LAMP2 PE=1 SV=2   | VASVININPN#TTHSTGSCR   | known      |
| P04070 | Vitamin K-dependent protein C OS=Homo sapiens GN=PROC PE=1 SV=1                  | EVFVHPN#YSK            | known      |
| P04066 | Tissue alpha-L-fucosidase OS=Homo sapiens GN=FUCA1 PE=1 SV=4                     | N#TTSVWYTSK            | known      |
| P55285 | Cadherin-6 OS=Homo sapiens GN=CDH6 PE=1 SV=1                                     | IFNIDSGN#GSIFTSK       | prediction |
| P55285 | Cadherin-6 OS=Homo sapiens GN=CDH6 PE=1 SV=1                                     | EDAQIN#TTIGSVTAQDPDAAR | known      |
| P40189 | Interleukin-6 receptor subunit beta OS=Homo sapiens GN=IL6ST PE=1 SV=2           | EQYTIIN#R              | known      |
| P40189 | Interleukin-6 receptor subunit beta OS=Homo sapiens GN=IL6ST PE=1 SV=2           | LTVN#LTNDR             | known      |
| P40189 | Interleukin-6 receptor subunit beta OS=Homo sapiens GN=IL6ST PE=1 SV=2           | N#LSCIVNEGK            | known      |

|        |                                                                                                     |                         |       |
|--------|-----------------------------------------------------------------------------------------------------|-------------------------|-------|
| Q12866 | Tyrosine-protein kinase Mer<br>OS=Homo sapiens GN=MERTK<br>PE=1 SV=2                                | ELLEEVGQN#GSR           | known |
| P55056 | Apolipoprotein C-IV OS=Homo<br>sapiens GN=APOC4 PE=1 SV=1                                           | ELLETVVN#R              | known |
| P01033 | Metalloproteinase inhibitor 1<br>OS=Homo sapiens GN=TIMP1<br>PE=1 SV=1                              | FVGTPEVN#QTTLYQR        | known |
| Q9Y5Y7 | Lymphatic vessel endothelial<br>hyaluronic acid receptor 1<br>OS=Homo sapiens GN=LYVE1<br>PE=1 SV=2 | ANQQLN#FTEAK            | known |
| Q9Y5Y7 | Lymphatic vessel endothelial<br>hyaluronic acid receptor 1<br>OS=Homo sapiens GN=LYVE1<br>PE=1 SV=2 | KANQQLN#FTEAK           | known |
| P14151 | L-selectin OS=Homo sapiens<br>GN=SELL PE=1 SV=2                                                     | DN#YTDLVAIQNK           | known |
| P26927 | Hepatocyte growth factor-like<br>protein OS=Homo sapiens<br>GN=MST1 PE=1 SV=2                       | GTAN#TTTAGVPCQR         | known |
| Q07954 | Prolow-density lipoprotein<br>receptor-related protein 1<br>OS=Homo sapiens GN=LRP1<br>PE=1 SV=2    | IETILLN#GTDR            | known |
| Q07954 | Prolow-density lipoprotein<br>receptor-related protein 1<br>OS=Homo sapiens GN=LRP1<br>PE=1 SV=2    | LN#GTDPIVAADSK          | known |
| P03951 | Coagulation factor XI OS=Homo<br>sapiens GN=F11 PE=1 SV=1                                           | GINYN#SSVAK             | known |
| P03951 | Coagulation factor XI OS=Homo<br>sapiens GN=F11 PE=1 SV=1                                           | VYSGILN#QSEIK           | known |
| P15144 | Aminopeptidase N OS=Homo<br>sapiens GN=ANPEP PE=1 SV=4                                              | N#ATLVNEADKLR           | known |
| P15144 | Aminopeptidase N OS=Homo<br>sapiens GN=ANPEP PE=1 SV=4                                              | GPSTPLPEDPNWN#VTEFHHTPK | known |
| P06276 | Cholinesterase OS=Homo<br>sapiens GN=BCHE PE=1 SV=1                                                 | EN#ETEIIK               | known |
| P06276 | Cholinesterase OS=Homo<br>sapiens GN=BCHE PE=1 SV=1                                                 | WSDIWN#ATK              | known |
| P33151 | Cadherin-5 OS=Homo sapiens<br>GN=CDH5 PE=1 SV=5                                                     | EVYPWYN#LTVEAK          | known |
| P48357 | Leptin receptor OS=Homo<br>sapiens GN=LEPR PE=1 SV=2                                                | YSEN#STTVIR             | known |
| P36955 | Pigment epithelium-derived<br>factor OS=Homo sapiens<br>GN=SERPINF1 PE=1 SV=4                       | VTQN#LTLIEESLTSEFIHDIDR | known |
| P07339 | Cathepsin D OS=Homo sapiens<br>GN=CTSD PE=1 SV=1                                                    | GSLSYLN#VTR             | known |

|        |                                                                                                |                           |            |
|--------|------------------------------------------------------------------------------------------------|---------------------------|------------|
| O00391 | Sulfhydryl oxidase 1 OS=Homo sapiens GN=QSOX1 PE=1 SV=3                                        | N#GSGAVFPVAGADVQTLR       | known      |
| Q15063 | Periostin OS=Homo sapiens GN=POSTN PE=1 SV=2                                                   | EVN#DTLLVNELK             | known      |
| P02671 | Fibrinogen alpha chain OS=Homo sapiens GN=FGA PE=1 SV=2                                        | MDGSLNFN#R                | known      |
| Q961Y4 | Carboxypeptidase B2 OS=Homo sapiens GN=CPB2 PE=1 SV=2                                          | QVHFFVN#ASDVDNVK          | known      |
| P04180 | Phosphatidylcholine-sterol acyltransferase OS=Homo sapiens GN=LCAT PE=1 SV=1                   | MAWPEDHVFISTPSFN#YTGR     | known      |
| P04180 | Phosphatidylcholine-sterol acyltransferase OS=Homo sapiens GN=LCAT PE=1 SV=1                   | AELSN#HTRPVILVPGCLGNQLEAK | known      |
| Q9H8L6 | Multimerin-2 OS=Homo sapiens GN=MMRN2 PE=1 SV=2                                                | FN#TTYINIGSSYFPEHGYFR     | known      |
| P13598 | Intercellular adhesion molecule 2 OS=Homo sapiens GN=ICAM2 PE=1 SV=2                           | N#FSCLAVLDLMSR            | known      |
| P13598 | Intercellular adhesion molecule 2 OS=Homo sapiens GN=ICAM2 PE=1 SV=2                           | AAPAPQEATATFN#STADR       | known      |
| P15151 | Poliovirus receptor OS=Homo sapiens GN=PVR PE=1 SV=2                                           | VEDEGN#YTCLFVTFPQGSR      | known      |
| P32942 | Intercellular adhesion molecule 3 OS=Homo sapiens GN=ICAM3 PE=1 SV=2                           | EIVCN#VTLGGER             | known      |
| Q6EMK4 | Vasorin OS=Homo sapiens GN=VASN PE=1 SV=1                                                      | LHEITN#ETFR               | known      |
| P13688 | Carcinoembryonic antigen-related cell adhesion molecule 1 OS=Homo sapiens GN=CEACAM1 PE=1 SV=2 | LSQGN#TTLSINPVK           | known      |
| Q14126 | Desmoglein-2 OS=Homo sapiens GN=DSG2 PE=1 SV=2                                                 | YVQN#GTYYTK               | known      |
| Q14126 | Desmoglein-2 OS=Homo sapiens GN=DSG2 PE=1 SV=2                                                 | IN#ATDADEPNTLNSK          | known      |
| Q15223 | Poliovirus receptor-related protein 1 OS=Homo sapiens GN=PVRL1 PE=1 SV=3                       | NPN#GTVTVISR              | known      |
| P35442 | Thrombospondin-2 OS=Homo sapiens GN=THBS2 PE=1 SV=2                                            | VVN#STTGTGEHLR            | known      |
| P12259 | Coagulation factor V OS=Homo sapiens GN=F5 PE=1 SV=4                                           | TWN#QSIALR                | prediction |
| P12259 | Coagulation factor V OS=Homo sapiens GN=F5 PE=1 SV=4                                           | DPPSDLLLLKQSN#SSK         | prediction |



|            |                                                                                                                 |                          |            |
|------------|-----------------------------------------------------------------------------------------------------------------|--------------------------|------------|
| P53634     | Dipeptidyl peptidase 1<br>OS=Homo sapiens GN=CTSC<br>PE=1 SV=2                                                  | DVN#CSVMGPQEK            | known      |
| Q865Q4     | G-protein coupled receptor 126<br>OS=Homo sapiens GN=GPR126<br>PE=1 SV=3                                        | ILSN#LSCNVK              | known      |
| Q02413     | Desmoglein-1 OS=Homo sapiens<br>GN=DSG1 PE=1 SV=2                                                               | TGEIN#ITSIVDR            | known      |
| P02679     | Fibrinogen gamma chain<br>OS=Homo sapiens GN=FGG<br>PE=1 SV=3                                                   | VDKDLQSLIEDILHQVEN#K     | known      |
| Q99784     | Noelin OS=Homo sapiens<br>GN=OLFM1 PE=1 SV=4                                                                    | VQN#MSQSIEVLDR           | known      |
| Q99784     | Noelin OS=Homo sapiens<br>GN=OLFM1 PE=1 SV=4                                                                    | SMVDFMNTDN#FTSHR         | known      |
| Q99784     | Noelin OS=Homo sapiens<br>GN=OLFM1 PE=1 SV=4                                                                    | LDPVSLQTLQTWN#TSYPK      | known      |
| Q9BTY2     | Plasma alpha-L-fucosidase<br>OS=Homo sapiens GN=FUCA2<br>PE=1 SV=2                                              | SQN#DTVTPDVWYTSKPK       | prediction |
| Q04756     | Hepatocyte growth factor<br>activator OS=Homo sapiens<br>GN=HGFC PE=1 SV=1                                      | CFLGN#GTGYR              | prediction |
| Q04756     | Hepatocyte growth factor<br>activator OS=Homo sapiens<br>GN=HGFC PE=1 SV=1                                      | DSVSVVLGQHFFN#R          | known      |
| Q9HDC<br>9 | Adipocyte plasma membrane-<br>associated protein OS=Homo<br>sapiens GN=APMAP PE=1 SV=2                          | AGPN#GTLFVADAYK          | known      |
| Q12841     | Follistatin-related protein 1<br>OS=Homo sapiens GN=FSTL1<br>PE=1 SV=1                                          | GSN#YSEILDK              | prediction |
| P00736     | Complement C1r subcomponent<br>OS=Homo sapiens GN=C1R PE=1<br>SV=2                                              | CN#YSIR                  | known      |
| P00736     | Complement C1r subcomponent<br>OS=Homo sapiens GN=C1R PE=1<br>SV=2                                              | EHEAQS#ASLDVFLGHTNVEELMK | known      |
| Q13822     | Ectonucleotide<br>pyrophosphatase/phosphodiesterase<br>family member 2<br>OS=Homo sapiens GN=ENPP2<br>PE=1 SV=3 | AIAN#LTCK                | prediction |
| P41222     | Prostaglandin-H2 D-isomerase<br>OS=Homo sapiens GN=PTGDS<br>PE=1 SV=1                                           | WFSAGLAS#SSWLR           | known      |
| P41222     | Prostaglandin-H2 D-isomerase<br>OS=Homo sapiens GN=PTGDS<br>PE=1 SV=1                                           | SVVAPATDGGLN#LTSTFLR     | known      |

|        |                                                                              |                      |            |
|--------|------------------------------------------------------------------------------|----------------------|------------|
| P80188 | Neutrophil gelatinase-associated lipocalin OS=Homo sapiens GN=LCN2 PE=1 SV=2 | SYN#VTSVLFR          | known      |
| Q9UHG3 | Prenylcysteine oxidase 1 OS=Homo sapiens GN=PCYOX1 PE=1 SV=3                 | LLHALGGDDFLGMLN#R    | known      |
| O14786 | Neuropilin-1 OS=Homo sapiens GN=NRP1 PE=1 SV=3                               | IGYSNN#GSDWK         | known      |
| O14786 | Neuropilin-1 OS=Homo sapiens GN=NRP1 PE=1 SV=3                               | RGPECSQN#YTTPSGVIK   | known      |
| Q9Y4L1 | Hypoxia up-regulated protein 1 OS=Homo sapiens GN=HYOU1 PE=1 SV=1            | VIN#ETWAWK           | known      |
| Q9Y4L1 | Hypoxia up-regulated protein 1 OS=Homo sapiens GN=HYOU1 PE=1 SV=1            | LSALDNLN#HSSMFLK     | known      |
| Q9NZP8 | Complement C1r subcomponent-like protein OS=Homo sapiens GN=C1RL PE=1 SV=2   | N#QSVNVFLGHTAIDEMLK  | known      |
| Q02985 | Complement factor H-related protein 3 OS=Homo sapiens GN=CFHR3 PE=1 SV=2     | FVQGN#STEVACHPGYGLPK | known      |
| O75144 | ICOS ligand OS=Homo sapiens GN=ICOSLG PE=1 SV=2                              | LFN#VTPQDEQK         | known      |
| O75144 | ICOS ligand OS=Homo sapiens GN=ICOSLG PE=1 SV=2                              | TVVTYHIPQN#SSENVDSR  | known      |
| P08519 | Apolipoprotein(a) OS=Homo sapiens GN=LPA PE=1 SV=1                           | WEYCN#LTR            | prediction |
| O95866 | Protein G6b OS=Homo sapiens GN=G6B PE=1 SV=1                                 | VN#LSCGGVSHPIR       | prediction |
| P28906 | Hematopoietic progenitor cell antigen CD34 OS=Homo sapiens GN=CD34 PE=1 SV=2 | LTQGICLEQN#K         | prediction |
| Q6UX71 | Plexin domain-containing protein 2 OS=Homo sapiens GN=PLXDC2 PE=1 SV=1       | VN#LSFDFPFYGHFLR     | known      |
| Q9NZK5 | Adenosine deaminase CECR1 OS=Homo sapiens GN=CECR1 PE=1 SV=2                 | NILDALMLN#TTR        | known      |
| O76027 | Annexin A9 OS=Homo sapiens GN=ANXA9 PE=1 SV=3                                | TFLN#FSVDK           | unknown    |
| Q12884 | Seprase OS=Homo sapiens GN=FAP PE=1 SV=5                                     | SVN#ASNYGLSPDR       | known      |

|            |                                                                                                            |                                                    |            |
|------------|------------------------------------------------------------------------------------------------------------|----------------------------------------------------|------------|
| P02786     | Transferrin receptor protein 1<br>OS=Homo sapiens GN=TFRC<br>PE=1 SV=2                                     | DFEDLYTPVN#GSIVIVR                                 | known      |
| P28799     | Granulins OS=Homo sapiens<br>GN=GRN PE=1 SV=2                                                              | EN#ATDLLTK                                         | known      |
| P01880     | Ig delta chain C region<br>OS=Homo sapiens GN=IGHD<br>PE=1 SV=2                                            | TLLN#ASR                                           | known      |
| P01880     | Ig delta chain C region<br>OS=Homo sapiens GN=IGHD<br>PE=1 SV=2                                            | EVN#TSGFAPARPPPQPGSTTFWAWSVLR                      | known      |
| P16070     | CD44 antigen OS=Homo sapiens<br>GN=CD44 PE=1 SV=3                                                          | AFN#STLPTMAQMEK                                    | known      |
| Q9UEW<br>3 | Macrophage receptor MARCO<br>OS=Homo sapiens GN=MARCO<br>PE=1 SV=1                                         | VDN#FTQNPGMFR                                      | known      |
| Q6UY14     | ADAMTS-like protein 4<br>OS=Homo sapiens<br>GN=ADAMTSL4 PE=1 SV=2                                          | LVSGN#LTDR                                         | known      |
| P48740     | Mannan-binding lectin serine<br>protease 1 OS=Homo sapiens<br>GN=MASP1 PE=1 SV=3                           | FGYLHTDN#R                                         | known      |
| P08571     | Monocyte differentiation<br>antigen CD14 OS=Homo sapiens<br>GN=CD14 PE=1 SV=2                              | N#VSWATGR                                          | known      |
| Q6YHK3     | CD109 antigen OS=Homo<br>sapiens GN=CD109 PE=1 SV=2                                                        | IN#YTVPQSGTFK                                      | known      |
| Q9H9B1     | Histone-lysine N-<br>methyltransferase EHMT1<br>OS=Homo sapiens GN=EHMT1<br>PE=1 SV=4                      | FYGN#VSR                                           | unknown    |
| O94898     | Leucine-rich repeats and<br>immunoglobulin-like domains<br>protein 2 OS=Homo sapiens<br>GN=LRIG2 PE=1 SV=3 | DFVCDDFLKPQIRTHPETIALRGMN#VTLTCTAVSSSDSPMSTV<br>WR | prediction |
| P55056     | Apolipoprotein C-IV OS=Homo<br>sapiens GN=APOC4 PE=1 SV=1                                                  | MKELLETVVN#R                                       | known      |
| Q9H9J4     | Ubiquitin carboxyl-terminal<br>hydrolase 42 OS=Homo sapiens<br>GN=USP42 PE=1 SV=3                          | VGAGLQNLGN#TCFANAALQCLTYTPPLANMYLSHEHSK            | unknown    |

---

N# denotes the N-glycosylation sites.

**Figure S6.** Venn plots of the reproducibility of identified N-glycoproteins a), N-glycopeptides b) and N-glycosylated sites c) in three replicates.

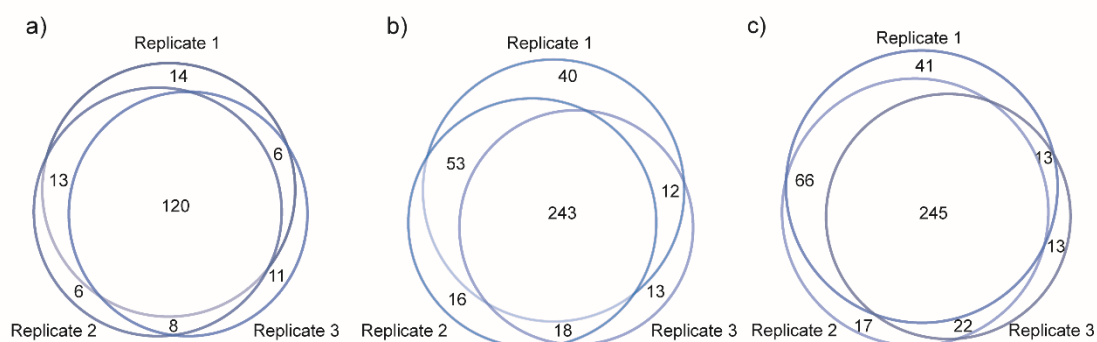

**Table S5** List of identified glycoproteins and glycopeptide sequences from tryptic digests of 0.1  $\mu$ L human plasma enriched by zwitterion functionalized PAMAM and analyzed by only one LC-MS/MS.

| Protein accession number | Protein description                                            | Peptide sequence          |
|--------------------------|----------------------------------------------------------------|---------------------------|
| P00738                   | Haptoglobin OS=Homo sapiens GN=HP PE=1 SV=1                    | NLFLN#HSEN#ATAK           |
| P00738                   | Haptoglobin OS=Homo sapiens GN=HP PE=1 SV=1                    | VVLHPN#YSQVDIGLIK         |
| P00738                   | Haptoglobin OS=Homo sapiens GN=HP PE=1 SV=1                    | MVSHHN#LTTGATLINEQWLLTTAK |
| P00739                   | Haptoglobin-related protein OS=Homo sapiens GN=HPR PE=1 SV=2   | NLFLN#HSEN#ATAK           |
| P00739                   | Haptoglobin-related protein OS=Homo sapiens GN=HPR PE=1 SV=2   | MVSHHN#LTTGATLINEQWLLTTAK |
| POC0L4                   | Complement C4-A OS=Homo sapiens GN=C4A PE=1 SV=1               | GLN#VTLSTGR               |
| POC0L4                   | Complement C4-A OS=Homo sapiens GN=C4A PE=1 SV=1               | FSDGLESN#SSTQFEVK         |
| P01011                   | Alpha-1-antichymotrypsin OS=Homo sapiens GN=SERPINA3 PE=1 SV=2 | YTG#ASALFILPDQDK          |
| P01011                   | Alpha-1-antichymotrypsin OS=Homo sapiens GN=SERPINA3 PE=1 SV=2 | TLN#QSSDELQLSMGNAMFVK     |

|        |                                                                   |                                   |
|--------|-------------------------------------------------------------------|-----------------------------------|
| P01011 | Alpha-1-antichymotrypsin OS=Homo sapiens<br>GN=SERPINA3 PE=1 SV=2 | FN#LTETSEAEIHQSFQHLLR             |
| P02763 | Alpha-1-acid glycoprotein 1 OS=Homo sapiens<br>GN=ORM1 PE=1 SV=1  | QDQCIYN#TTYLNVQR                  |
| P02765 | Alpha-2-HS-glycoprotein OS=Homo sapiens<br>GN=AHSG PE=1 SV=1      | VCQDCPLLAPLN#DTR                  |
| P02765 | Alpha-2-HS-glycoprotein OS=Homo sapiens<br>GN=AHSG PE=1 SV=1      | AALAAFNAQNN#GSNFQLEEISR           |
| P01042 | Kininogen-1 OS=Homo sapiens GN=KNG1 PE=1<br>SV=2                  | ITYSIVQTN#CSK                     |
| P01042 | Kininogen-1 OS=Homo sapiens GN=KNG1 PE=1<br>SV=2                  | LNAENN#ATFYFK                     |
| P02787 | Serotransferrin OS=Homo sapiens GN=TF PE=1<br>SV=3                | CGLVPVLAENYN#K                    |
| P02787 | Serotransferrin OS=Homo sapiens GN=TF PE=1<br>SV=3                | QQQHILFGSN#VTDCSGNFCLFR           |
| P00450 | Ceruloplasmin OS=Homo sapiens GN=CP PE=1<br>SV=1                  | AGLQAFFQVQECN#K(S)                |
| P00450 | Ceruloplasmin OS=Homo sapiens GN=CP PE=1<br>SV=1                  | EHEGAIYPDN#TTDFQR                 |
| P00450 | Ceruloplasmin OS=Homo sapiens GN=CP PE=1<br>SV=1                  | EN#LTAPGSDSAVFFEQGTTR             |
| P00450 | Ceruloplasmin OS=Homo sapiens GN=CP PE=1<br>SV=1                  | ELHHLQEQN#VSNAFLDKGEFYIGSK        |
| P01023 | Alpha-2-macroglobulin OS=Homo sapiens<br>GN=A2M PE=1 SV=3         | SLGNVN#FTVSAEALESQELCGTEVPSVPEHGR |
| P19652 | Alpha-1-acid glycoprotein 2 OS=Homo sapiens<br>GN=ORM2 PE=1 SV=2  | QNQCIFYN#SSYLNVQR                 |
| P19652 | Alpha-1-acid glycoprotein 2 OS=Homo sapiens<br>GN=ORM2 PE=1 SV=2  | QN#QCIFYN#SSYLNVQR                |
| P01009 | Alpha-1-antitrypsin OS=Homo sapiens<br>GN=SERPINA1 PE=1 SV=3      | YLG#ATAIFFLPDEGK                  |
| P01859 | Ig gamma-2 chain C region OS=Homo sapiens<br>GN=IGHG2 PE=1 SV=2   | EEQFN#STFR                        |
| P01859 | Ig gamma-2 chain C region OS=Homo sapiens<br>GN=IGHG2 PE=1 SV=2   | TKPREEQFN#STFR                    |
| P01024 | Complement C3 OS=Homo sapiens GN=C3 PE=1<br>SV=2                  | TVLTPATNHMGN#VTFTIPANR            |

|        |                                                                                    |                                    |
|--------|------------------------------------------------------------------------------------|------------------------------------|
| P01877 | Ig alpha-2 chain C region OS=Homo sapiens<br>GN=IGHA2 PE=1 SV=3                    | TPLTAN#ITK                         |
| P08185 | Corticosteroid-binding globulin OS=Homo sapiens<br>GN=SERPINA6 PE=1 SV=1           | AQLLQGLGFN#LTER                    |
| P01876 | Ig alpha-1 chain C region OS=Homo sapiens<br>GN=IGHA1 PE=1 SV=2                    | LAGKPTHVN#VSVVMAEVDGTCY            |
| P02790 | Hemopexin OS=Homo sapiens GN=HPX PE=1 SV=2                                         | SWPAVGN#CSSALR                     |
| P04196 | Histidine-rich glycoprotein OS=Homo sapiens<br>GN=HRG PE=1 SV=1                    | VIDFN#CTTSSVSSALANTK               |
| P01008 | Antithrombin-III OS=Homo sapiens GN=SERPINC1<br>PE=1 SV=1                          | SLTFN#ETYQDISELVYGA                |
| P01857 | Ig gamma-1 chain C region OS=Homo sapiens<br>GN=IGHG1 PE=1 SV=1                    | EEQYN#STYR                         |
| P01861 | Ig gamma-4 chain C region OS=Homo sapiens<br>GN=IGHG4 PE=1 SV=1                    | EEQFN#STYR                         |
| P01871 | Ig mu chain C region OS=Homo sapiens GN=IGHM<br>PE=1 SV=3                          | THTN#ISESHPN#ATFSAVGEASICEDDWNSGER |
| P02749 | Beta-2-glycoprotein 1 OS=Homo sapiens<br>GN=APOH PE=1 SV=3                         | VYKPSAGN#NSLYR                     |
| P04004 | Vitronectin OS=Homo sapiens GN=VTN PE=1 SV=1                                       | NN#ATVHEQVGGPSLTSDLQAQSK           |
| P10909 | Clusterin OS=Homo sapiens GN=CLU PE=1 SV=1                                         | LAN#LTQGEDQYYLR                    |
| Q14624 | Inter-alpha-trypsin inhibitor heavy chain H4<br>OS=Homo sapiens GN=ITIH4 PE=1 SV=4 | LPTQN#ITFQTESSVAEQEAQSPK           |
| P08603 | Complement factor H OS=Homo sapiens GN=CFH<br>PE=1 SV=4                            | MDGASN#VTCINSR                     |
| P27169 | Serum paraoxonase/arylesterase 1 OS=Homo<br>sapiens GN=PON1 PE=1 SV=3              | VTQVYAEN#GTVLQGSTVASVYK            |
| P05543 | Thyroxine-binding globulin OS=Homo sapiens<br>GN=SERPINA7 PE=1 SV=2                | TLYETEVEFSTDFSN#ISAAK              |

---

N# denotes the N-glycosylation sites.

**Figure S7.** Nano-LC-MS/MS mass spectra of doubly charged N-glycopeptide EEQFN#STFR [(M+2H)<sup>2+</sup> at m/z 579.76] from Ig gamma-2 chain C region a), and QDQCIYN#TTYLNVQR [(M+2H)<sup>2+</sup> at m/z 958.94] from Alpha-1-acid glycoprotein 1 b). N# denotes the N-glycosylation sites.

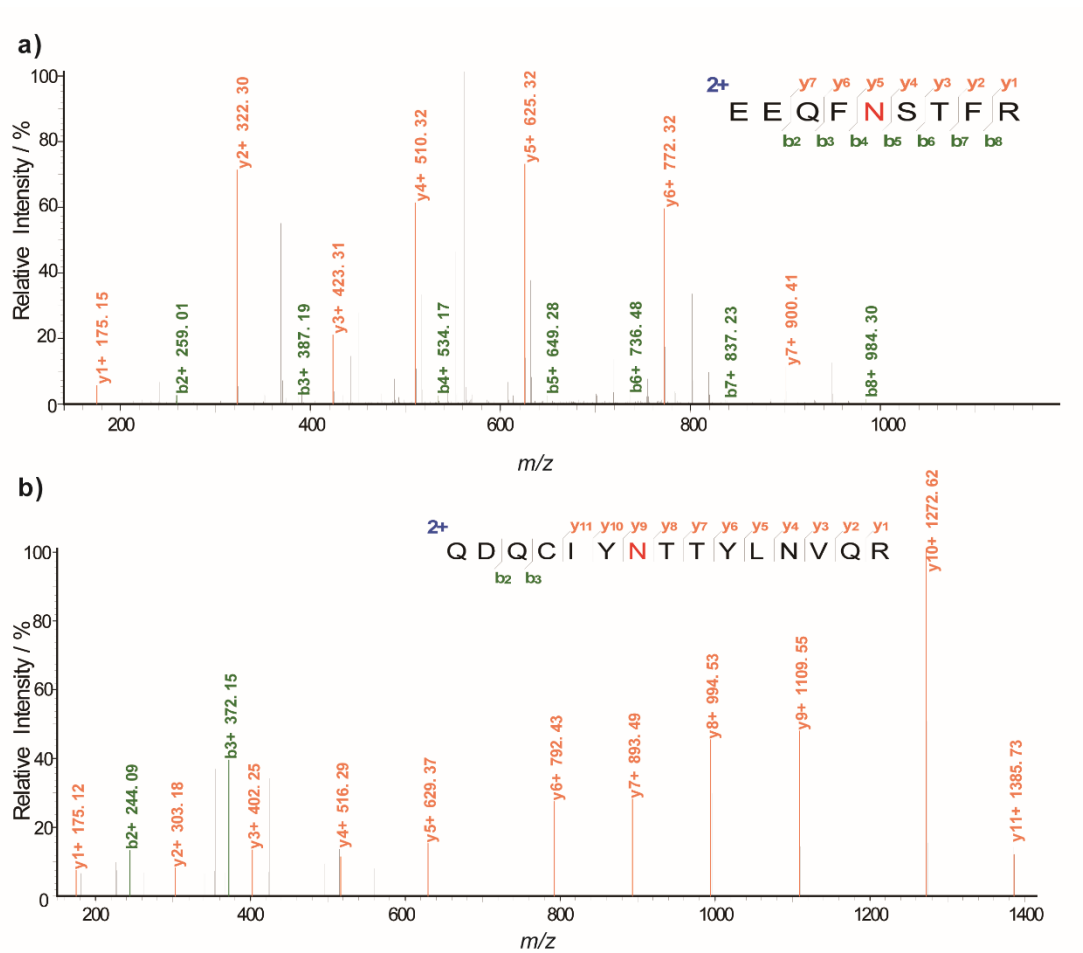

Supplement: srep29776-s1.pdf [file srep29776-s1.pdf]
